# Supplementary material for: Deciphering Gut Microbiome Responses upon Microplastic Exposure via Integrating Metagenomics and Activity-Based Metabolomics
Source: MDPI journal article supplement (doi:10.3390/metabo13040530), 2023-04-07

## Supplementary Information

# Deciphering gut microbiome responses upon microplastic exposure via integrating metagenomics and activity-based metabolomics

Pengcheng Tu<sup>a,1</sup>, Jingchuan Xue<sup>b,1</sup>, Huixia Niu<sup>a,e</sup>, Qiong Tang<sup>c</sup>, Zhe Mo<sup>a</sup>, Xiaodong Zheng<sup>d</sup>, Lizhi Wu<sup>a</sup>, Zhijian Chen<sup>a</sup>, Yanpeng Cai<sup>b</sup>, and Xiaofeng Wang<sup>a,\*</sup>

<sup>a</sup> Department of Environmental Health, Zhejiang Provincial Center for Disease Control and Prevention, 3399 Binsheng Road, Hangzhou, 310051 China.

<sup>b</sup> Guangdong Provincial Key Laboratory of Water Quality Improvement and Ecological Restoration for Watersheds, Institute of Environmental and Ecological Engineering, Guangdong University of Technology, Guangzhou, 510006 China.

<sup>c</sup> College of Standardization, China Jiliang University, Hangzhou, 310018 China.

<sup>d</sup> Department of Food Science and Nutrition, Zhejiang University, Hangzhou, 310058 China.

<sup>e</sup> School of Medicine, Ningbo University, Ningbo, 315000 China.

<sup>1</sup> Pengcheng Tu and Jingchuan Xue equally contributed to this work.

\* Correspondence: xfwang@cdc.zj.cn

Figure. S1 Metabolic impact of MP exposure. (A) Body weight curve. (B) Total weight gain. (C) Food intake. Organ indices of liver (D), kidney (D), and cecum (F). Student's t-test,  $p < 0.05$  was considered statistically significant.

Figure. S2 KEGG enrichment analysis of differential metabolites.

Figure. S3 Wilcoxonrank-sum test on phenotype.

Figure. S4 Alterations in metabolites that are related to ABC transporters.

Figure S1

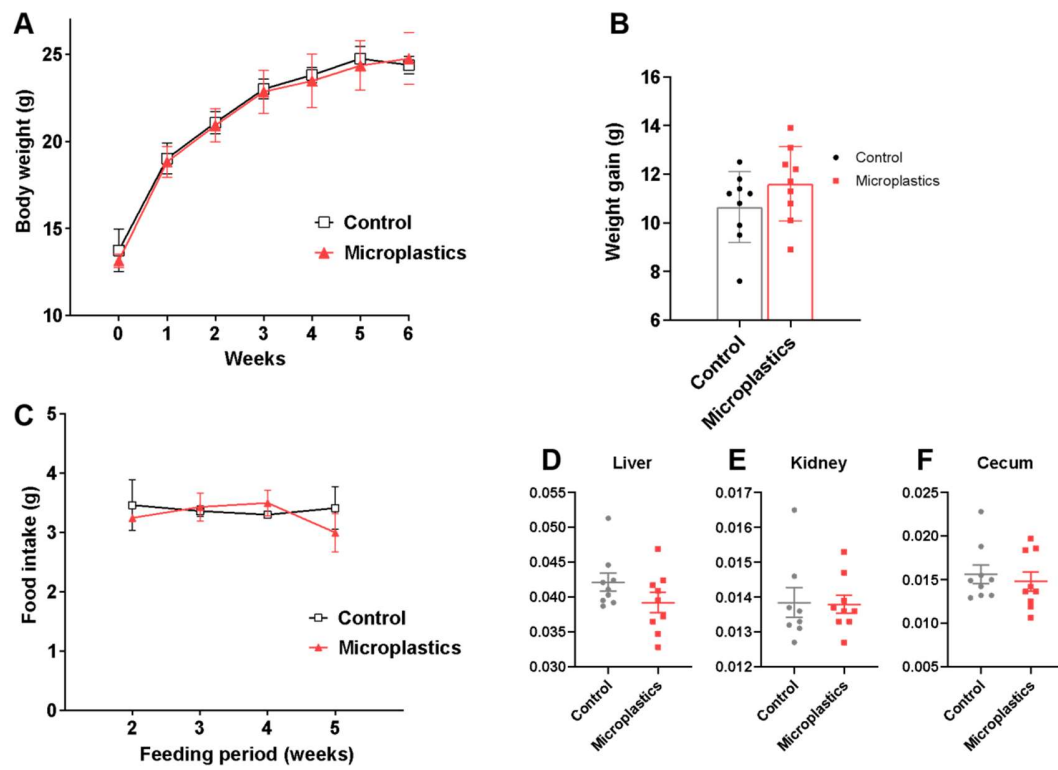

Figure S2

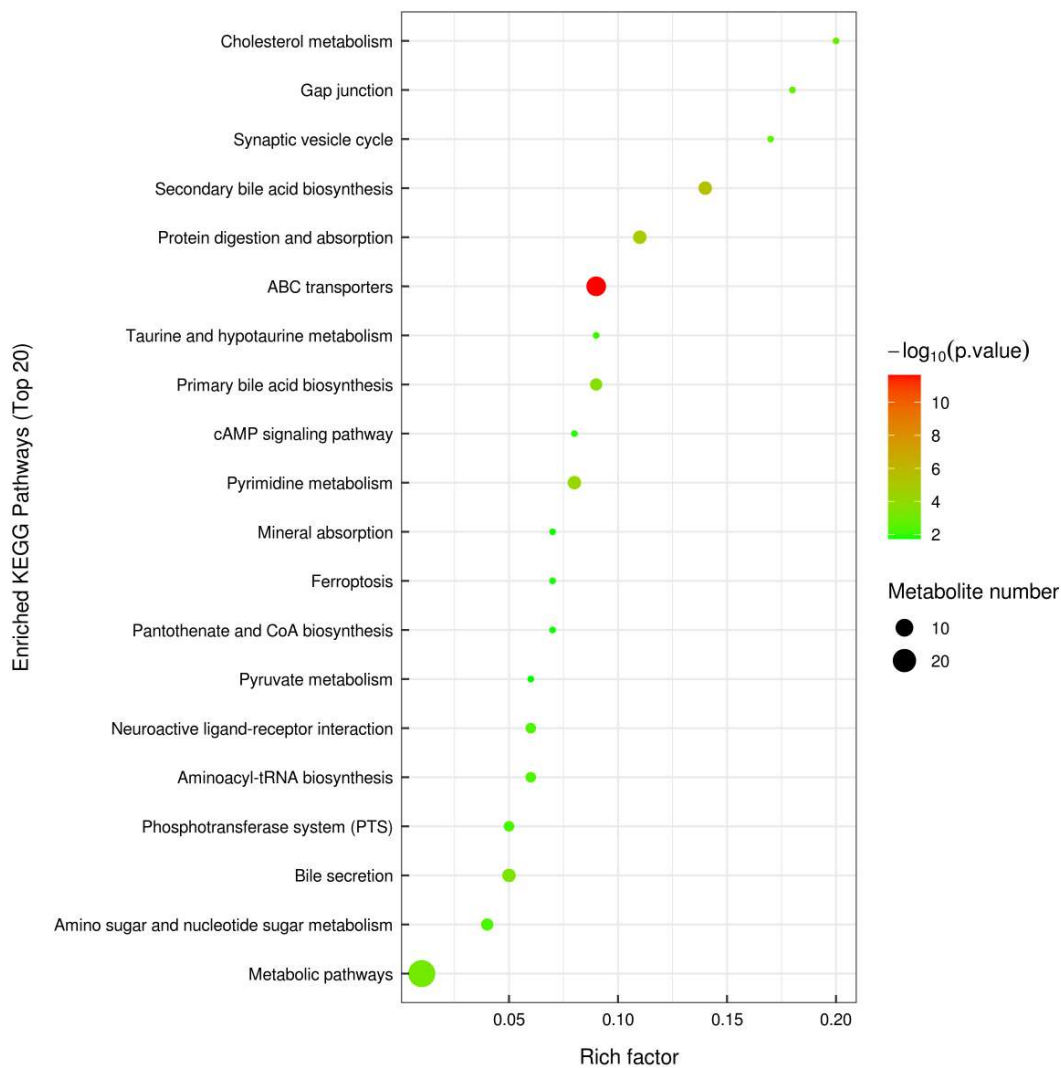

Figure S3

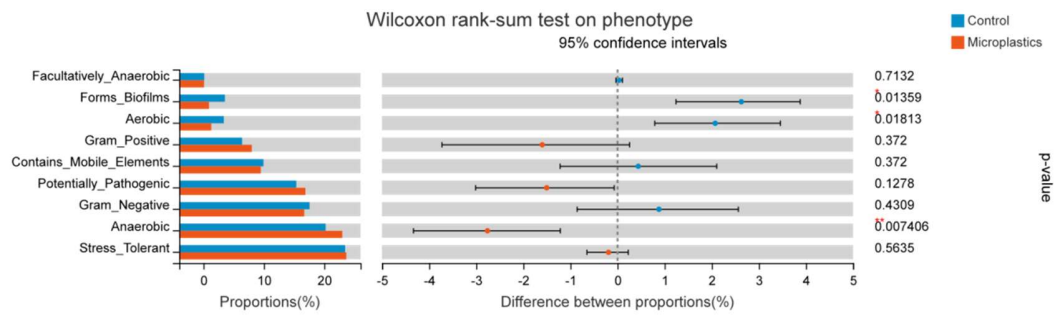

Figure S4

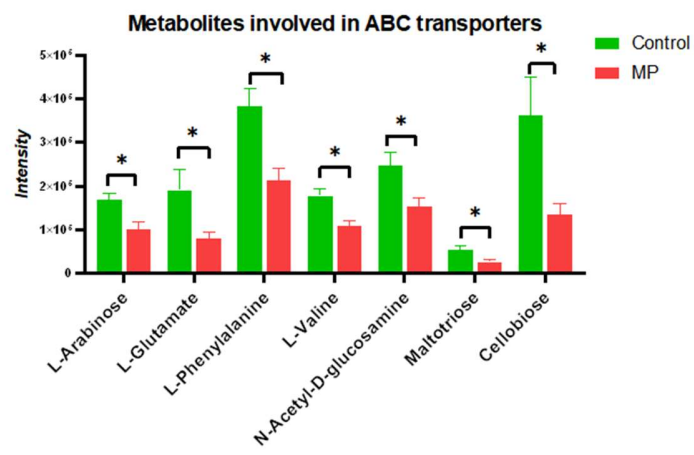

Supplement: s1 [file s1]
